# Supplementary material
Source: PubMed Central journal article supplement (PMC3677120)

# Green Reflectance Image

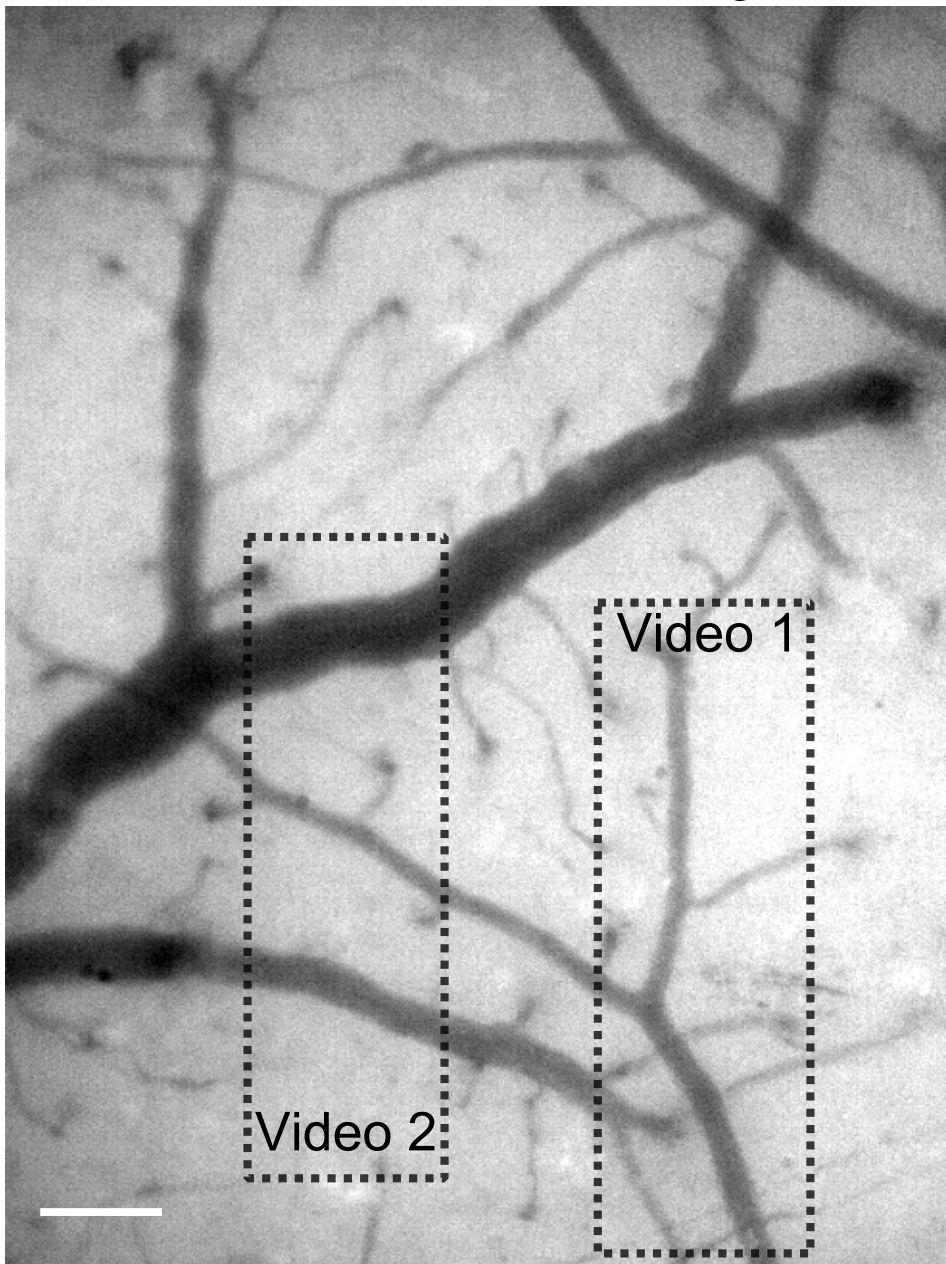

## Animal 2

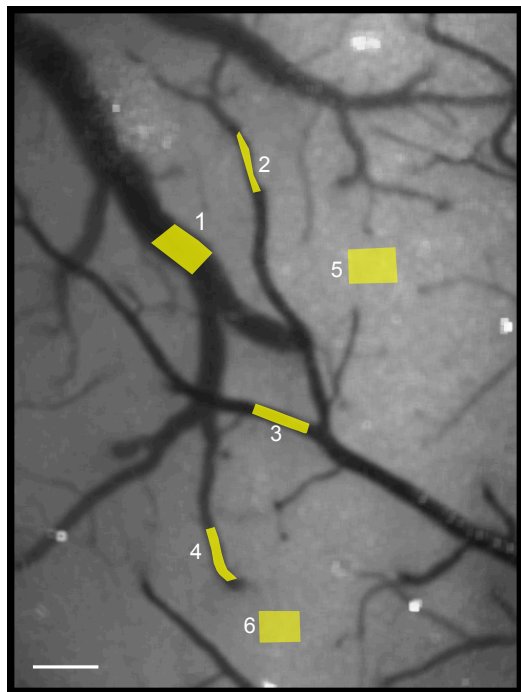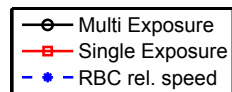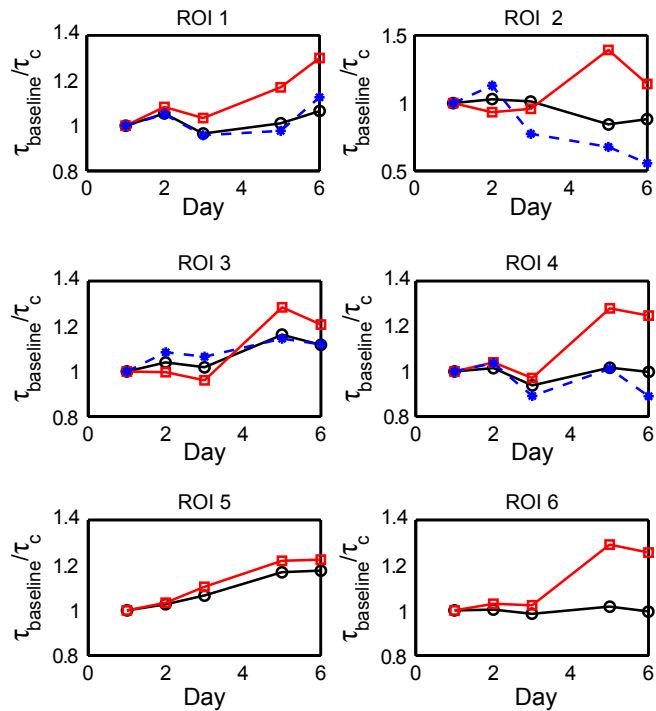

## Animal 3

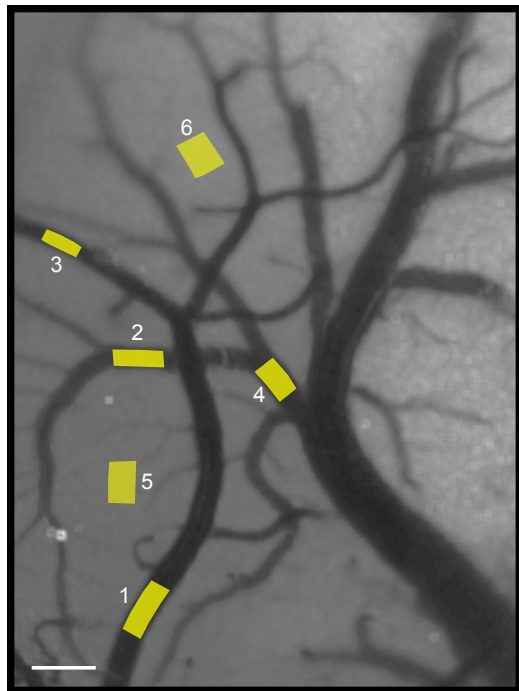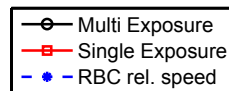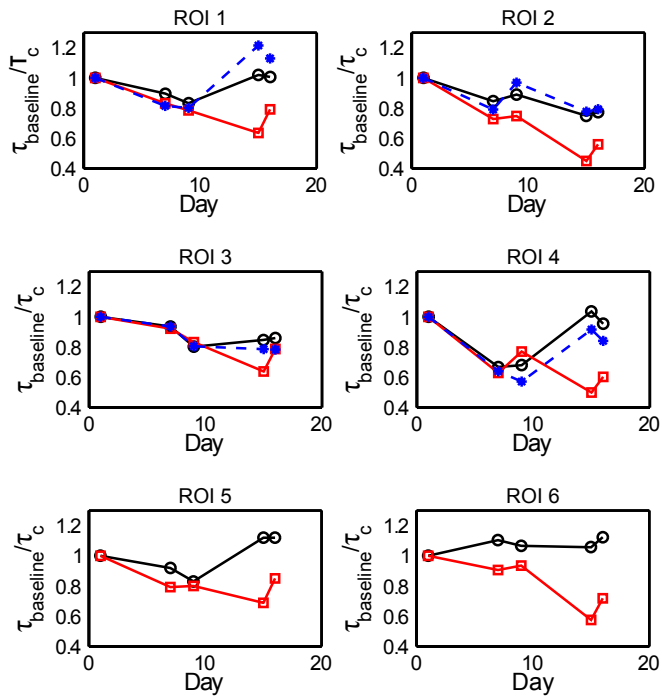

# Animal 6

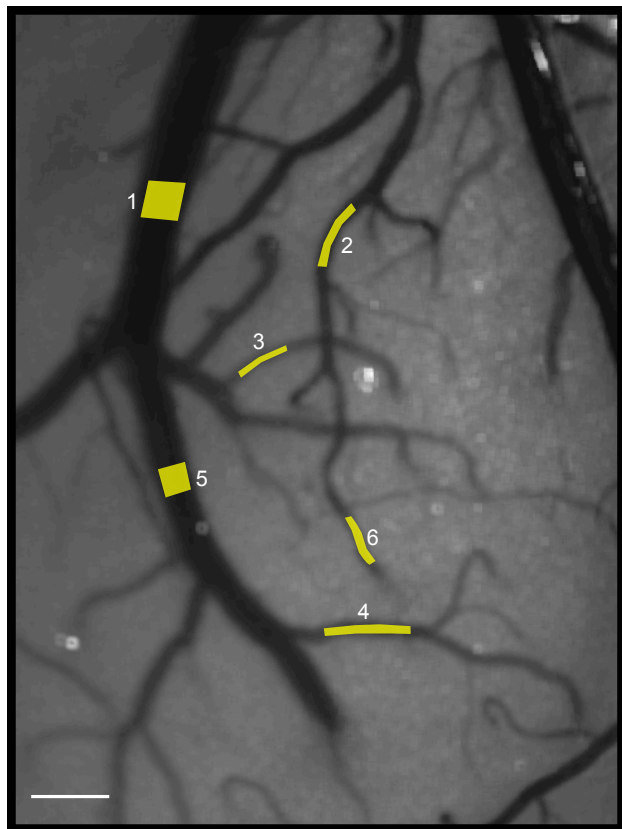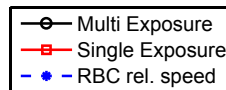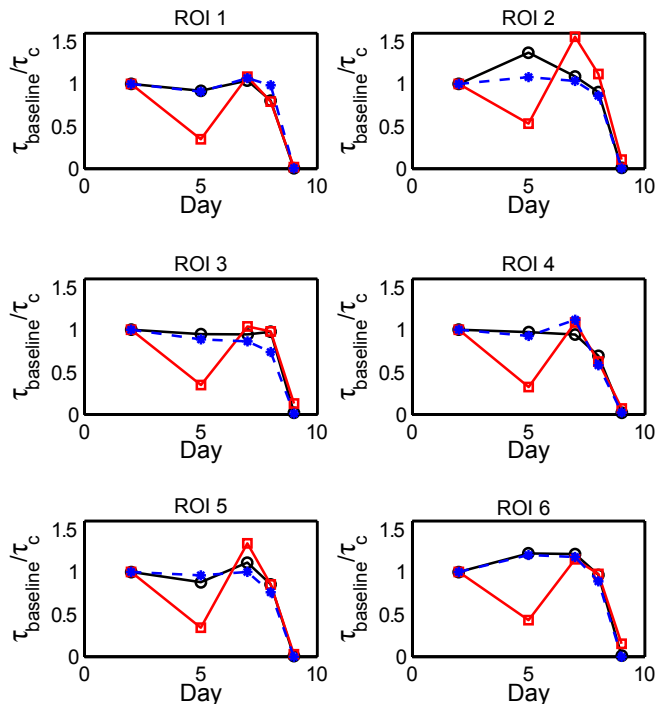

# Animal 9

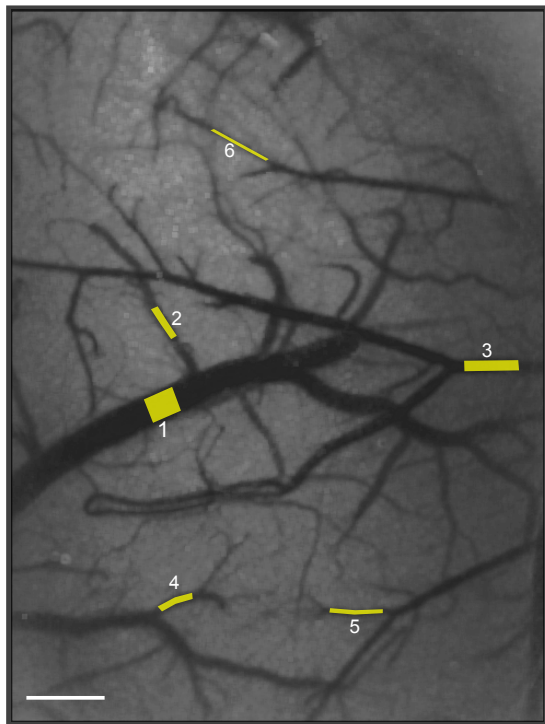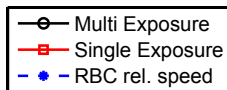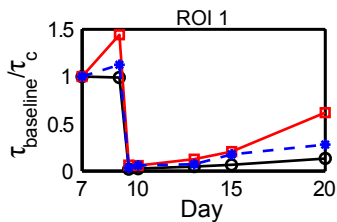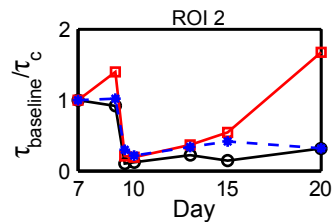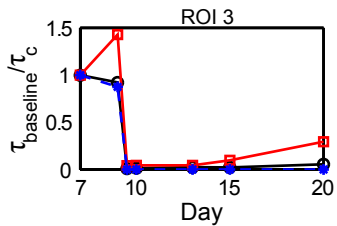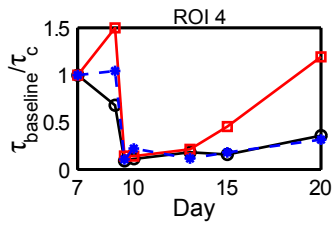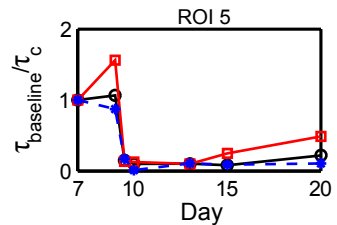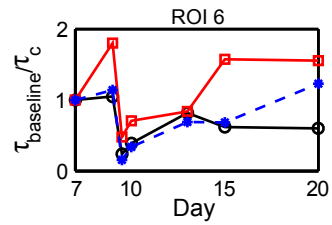

Supplement: jcbfm201357x1.pdf [file jcbfm201357x1.pdf]
